# Supplementary material for: Speciation and decomposition pathways of ruthenium catalysts used for selective C–H hydroxylation
Source: Royal Society of Chemistry journal article supplement (doi:10.1039/c4sc01050g), 2014-01-01
Supplement: c4sc01050g1.pdf [file c4sc01050g1.pdf]

## Speciation and decomposition pathways of ruthenium catalysts used for selective C-H hydroxylation

Cornelia Flender, Ashley M. Adams, Jennifer L. Roizen, Eric McNeill,  
J. Du Bois\* and Richard N. Zare\*

Department of Chemistry, Stanford University, 333 Campus Drive, Stanford, CA 94305

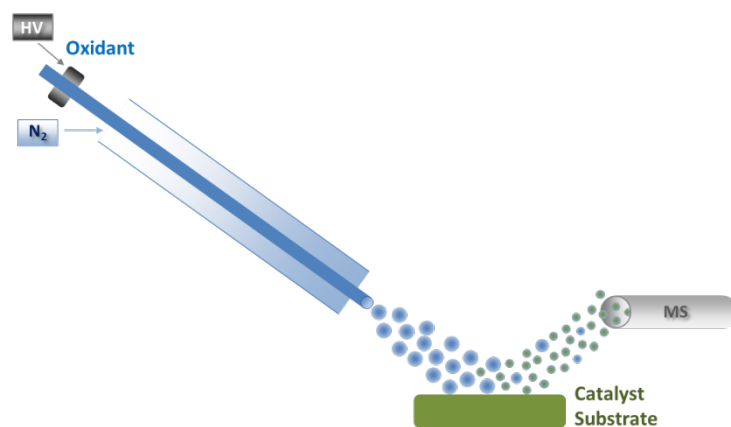

S1: DESI setup for reaction monitoring of ruthenium catalyzed hydroxylation. Homebuilt DESI-source: A fused silica tubing (100  $\mu\text{m}$  i.d., 360  $\mu\text{m}$  o.d.) was used to spray H<sub>2</sub>O (or aqueous oxidant solution) at a flow rate of 15  $\mu\text{L}/\text{min}$  and 5 kV spray voltage. An outer metal capillary was connected to the nebulizing gas (140 psi N<sub>2</sub>) using a Swagelok T-fitting. The inner capillary was adjusted to extend approx.. 1 mm from the outer capillary. The source was placed approx. 2 mm in front of the MS inlet capillary at an angle of appr. 55 degrees.

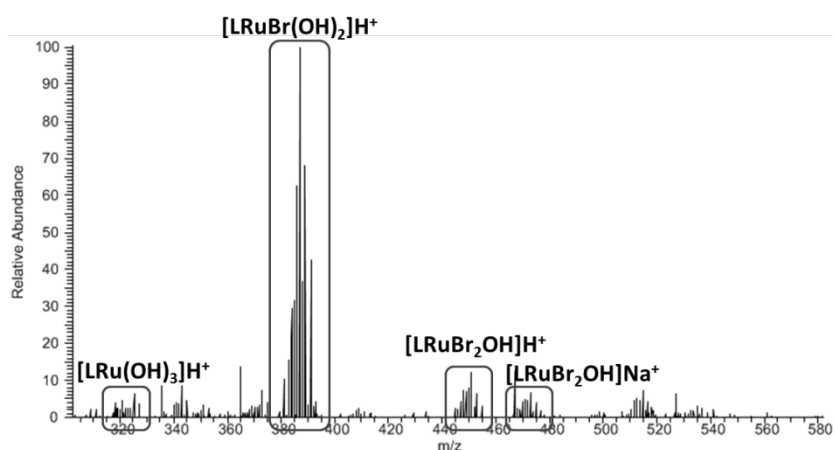

S2: DESI spectrum of 1mM (Me<sub>3</sub>tacn)RuBr<sub>3</sub> spotted on paper and sprayed with H<sub>2</sub>O.

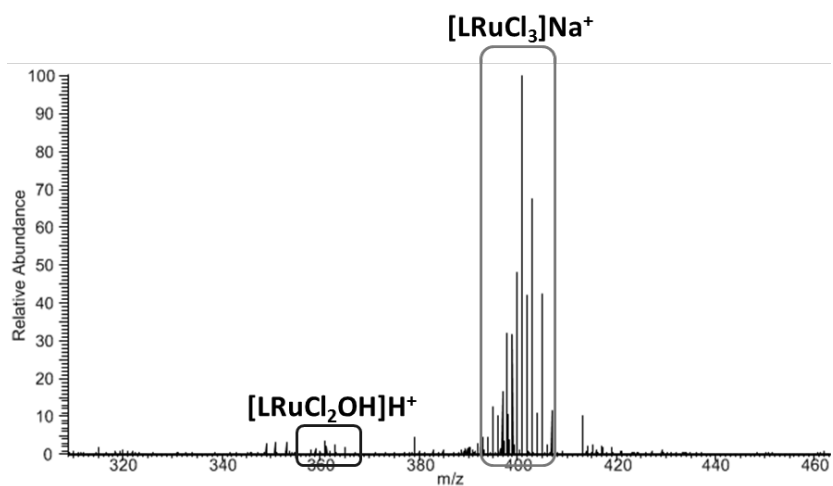

S3: DESI spectrum of 1 mM  $(\text{Me}_3\text{tacn})\text{RuCl}_3$  spotted on paper and sprayed with  $\text{H}_2\text{O}$ .

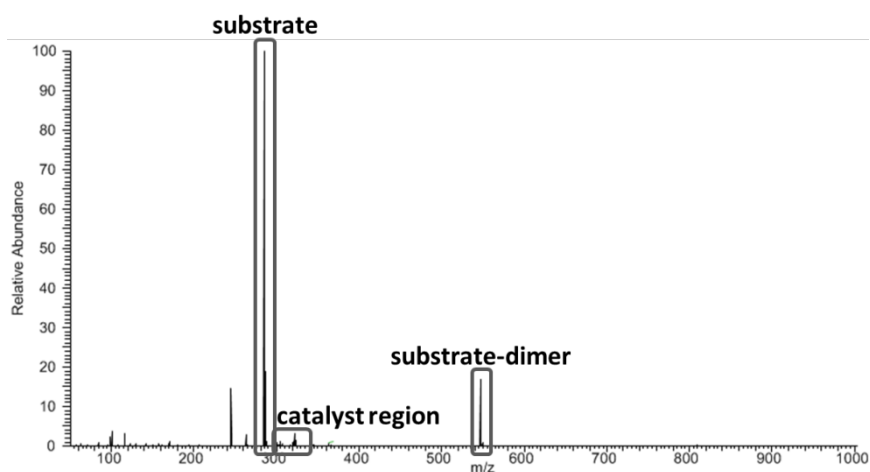

S4: Full DESI spectrum of 1 mM  $(\text{Me}_3\text{tacn})\text{RuCl}_3$  in  $\text{H}_2\text{O}$ , activated with  $\text{AgClO}_4$ , treated with substrate, spotted on paper and sprayed with 0.1 mM  $\text{NaIO}_4$ .

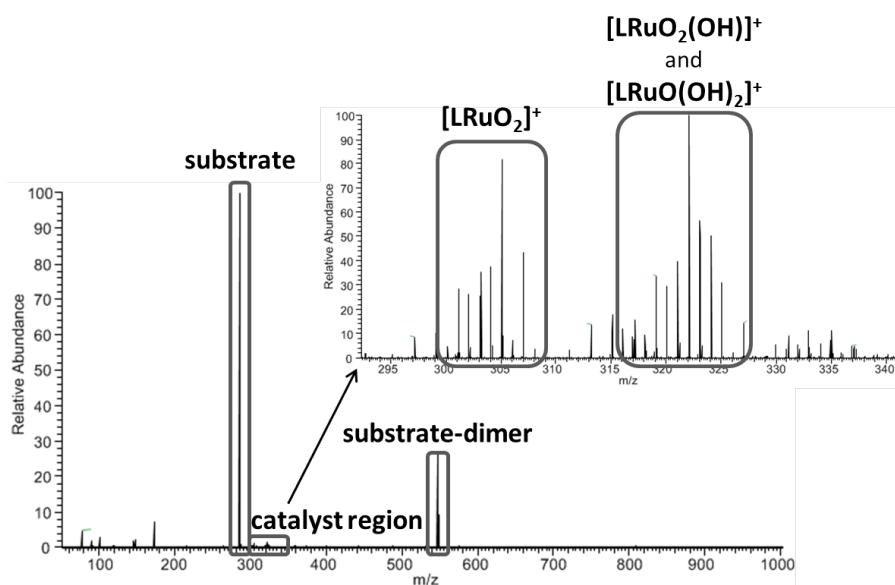

S5: 1 mmol activated  $(\text{Me}_3\text{tacn})\text{RuBr}_3$  and substrate **2** sprayed with 0.1 mmol  $\text{NaIO}_4$ .

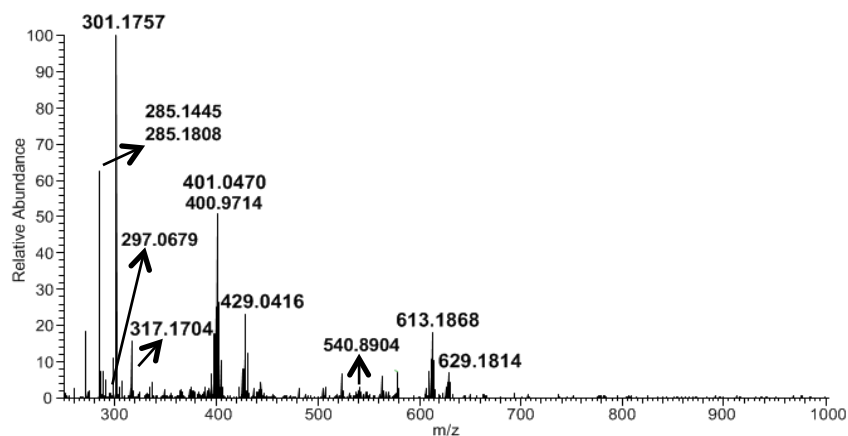

S6: DESI spectrum of the incubated reaction mixture containing  $(\text{Me}_3\text{tacn})\text{RuCl}_3$ ,  $\text{AgClO}_4$  and substrate **2**, sprayed with  $5 \cdot 10^{-4}$  M  $\text{NaIO}_4$ .

| m/z      | elemental composition                                                           | error in ppm | molecule                          |
|----------|---------------------------------------------------------------------------------|--------------|-----------------------------------|
| 285.1458 | $[\text{C}_{16}\text{H}_{22}\text{O}_3]\text{Na}^+$                             | -1.05        | ketone product                    |
| 285.1821 | $[\text{C}_{17}\text{H}_{26}\text{O}_2]\text{Na}^+$                             | -1.40        | Substrate <b>2</b>                |
| 297.0692 | $[\text{C}_{18}\text{H}_{42}\text{N}_6\text{O}_3\text{Ru}_2]^{++}$              | -3.60        | Decomposition product             |
| 301.1771 | $[\text{C}_{17}\text{H}_{26}\text{O}_3]\text{Na}^+$                             | -1.00        | Product <b>3</b>                  |
| 317.1718 | $[\text{C}_{17}\text{H}_{26}\text{O}_4]\text{Na}^+$                             | -1.58        | Bis-hydroxylated product          |
| 400.9732 | $[\text{C}_9\text{H}_{21}\text{Cl}_3\text{N}_3\text{Ru}]\text{Na}^+$            | -1.25        | Starting material                 |
| 401.0488 | $[\text{C}_{11}\text{H}_{22}\text{N}_3\text{O}_5\text{Ru}]\text{Na}^+$          | -1.75        | Decomposition product             |
| 429.0433 | $[\text{C}_{12}\text{H}_{22}\text{N}_3\text{O}_6\text{Ru}]\text{Na}^+$          | -2.56        | Decomposition product             |
| 540.8929 | $[\text{C}_9\text{H}_{21}\text{Cl}_2\text{N}_3\text{O}_3\text{IRu}]\text{Na}^+$ | -2.03        | $\text{IO}_3$ -adduct to catalyst |
| 613.1896 | $[\text{C}_{23}\text{H}_{42}\text{N}_3\text{O}_8\text{Ru}]\text{Na}^+$          | -1.96        | Decomposition product             |
| 629.1843 | $[\text{C}_{23}\text{H}_{42}\text{N}_3\text{O}_9\text{Ru}]\text{Na}^+$          | -2.23        | Decomposition product             |

S7: Full list of identified signals in the aqueous layer of the incubated mixture of  $(\text{Me}_3\text{tacn})\text{RuCl}_3$ ,  $\text{NaIO}_4$  and substrate **2**. The monomeric ruthenium compounds are also decomposition products and are not catalytically active.

| Compound             | 10 min | 30 min | 3 h   | 24 h  |
|----------------------|--------|--------|-------|-------|
| <b>Organic layer</b> |        |        |       |       |
| 285.1458             | 4      | 24     | 59    | 62    |
| Substrate <b>2</b>   | 162    | 68     | 54    | 57    |
| Product <b>3</b>     | 7      | 43     | 106   | 108   |
| <b>Aqueous layer</b> |        |        |       |       |
| 297.0692             | 0      | 0      | 1.72  | 1.65  |
| 401.0448             | 0      | 0      | 25.39 | 47.09 |
| 540.8929             | 0      | 0      | 0.68  | 2.91  |
| 613.1896             | 0.12   | 0.56   | 2.15  | 17.06 |
| 629.1843             | 0      | 0.08   | 3.28  | 6.38  |

S8: Intensities of the most significant signals in the incubated mixture.

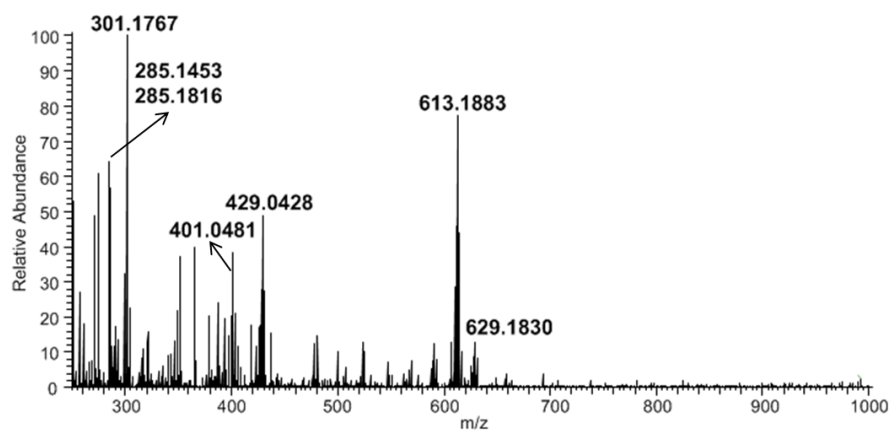

S9: Spectrum of incubated  $(\text{Me}_3\text{tacn})\text{RuBr}_3$ ,  $\text{AgClO}_4$ ,  $\text{NaIO}_4$  and substrate **2**.

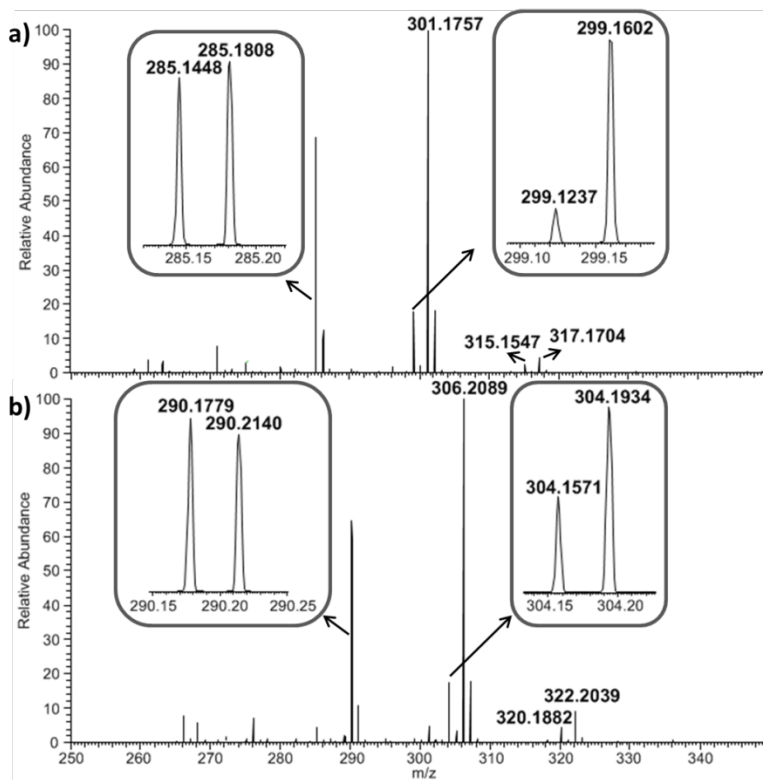

S10: Ethereal layer of the incubated mixture of  $(\text{Me}_3\text{tacn})\text{RuCl}_3$ ,  $\text{AgClO}_4$ ,  $\text{NaIO}_4$  and a) substrate **2**, b)  $\text{d}_5$ -labeled substrate **10**.
